# Supplementary material for: α-Tocopherol-based cationic amphiphiles with a novel pH sensitive hybrid linker for gene delivery
Source: Royal Society of Chemistry journal article supplement (doi:10.1039/c8ob00276b), 2018-01-01
Supplement: c8ob00276b1.pdf [file c8ob00276b1.pdf]

**$\alpha$ -Tocopherol-based cationic amphiphiles with a novel pH sensitive hybrid linker for gene delivery.**

Venkanna Muripiti <sup>1</sup>, Hari Krishnareddy Rachamalla <sup>2</sup>, Rajkumar Banerjee<sup>2\*</sup> Srilakshmi.V Patri<sup>1\*</sup>

<sup>1</sup>National Institute of Technology, Warangal-506004, Telangana, India,

<sup>2</sup> Center for Chemical Biology, Indian Institute of Chemical Technology, Hyderabad-500607, Telangana, India.

Email: [patrisrilakshmi@gmail.com](mailto:patrisrilakshmi@gmail.com).

## Spectral Data

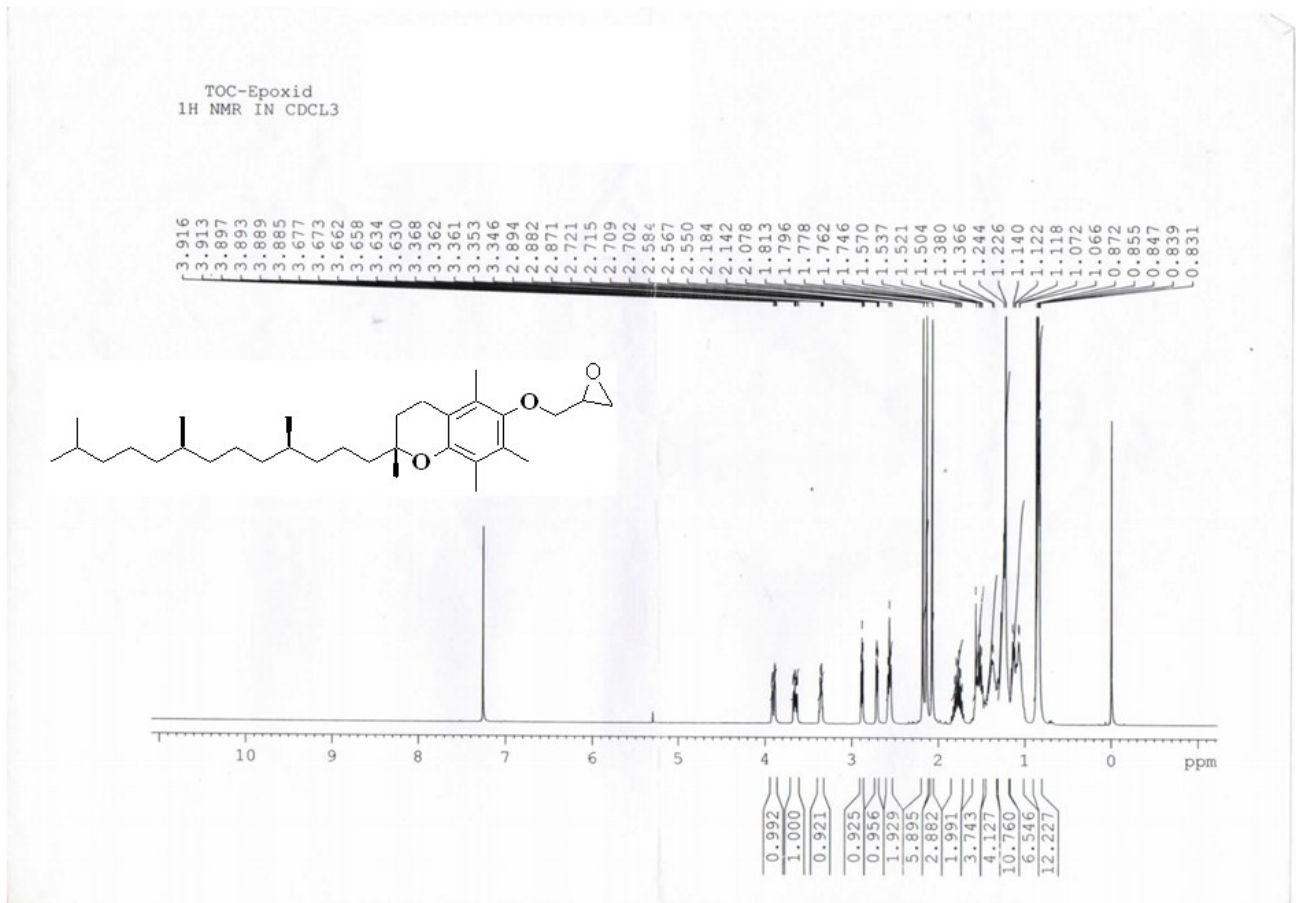

**<sup>1</sup>H NMR Spectra of Intermediate 1A, Scheme 1A**

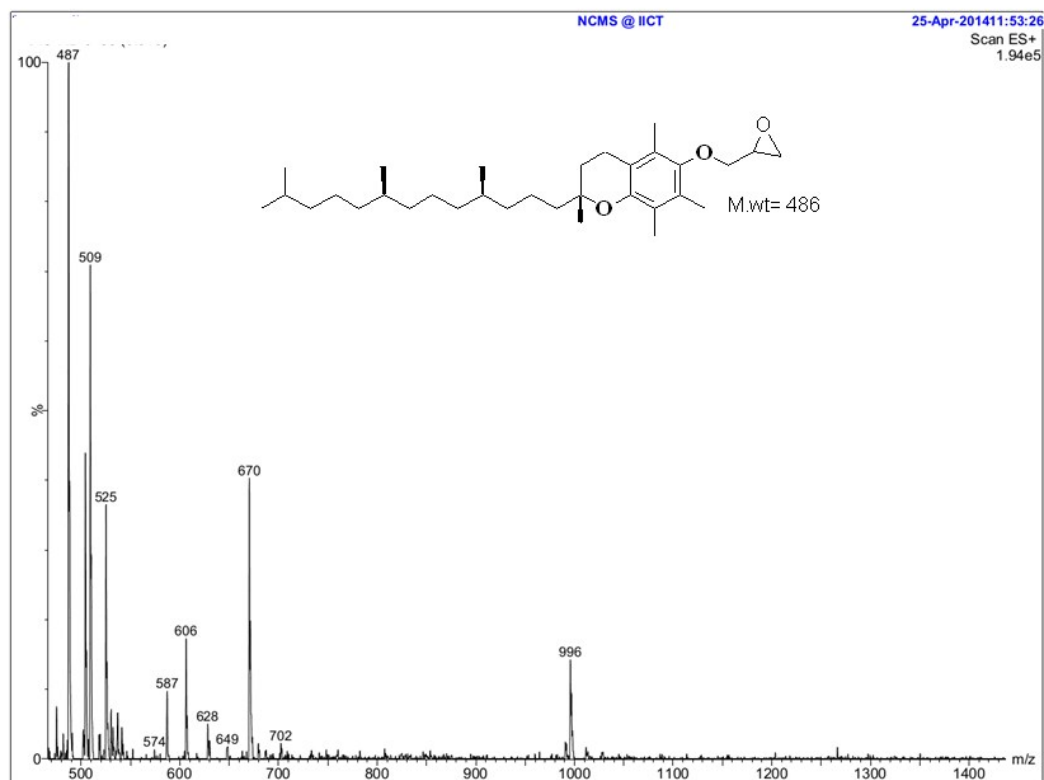

**ESI-Mass Spectra of Intermediate 1A, Scheme 1A**

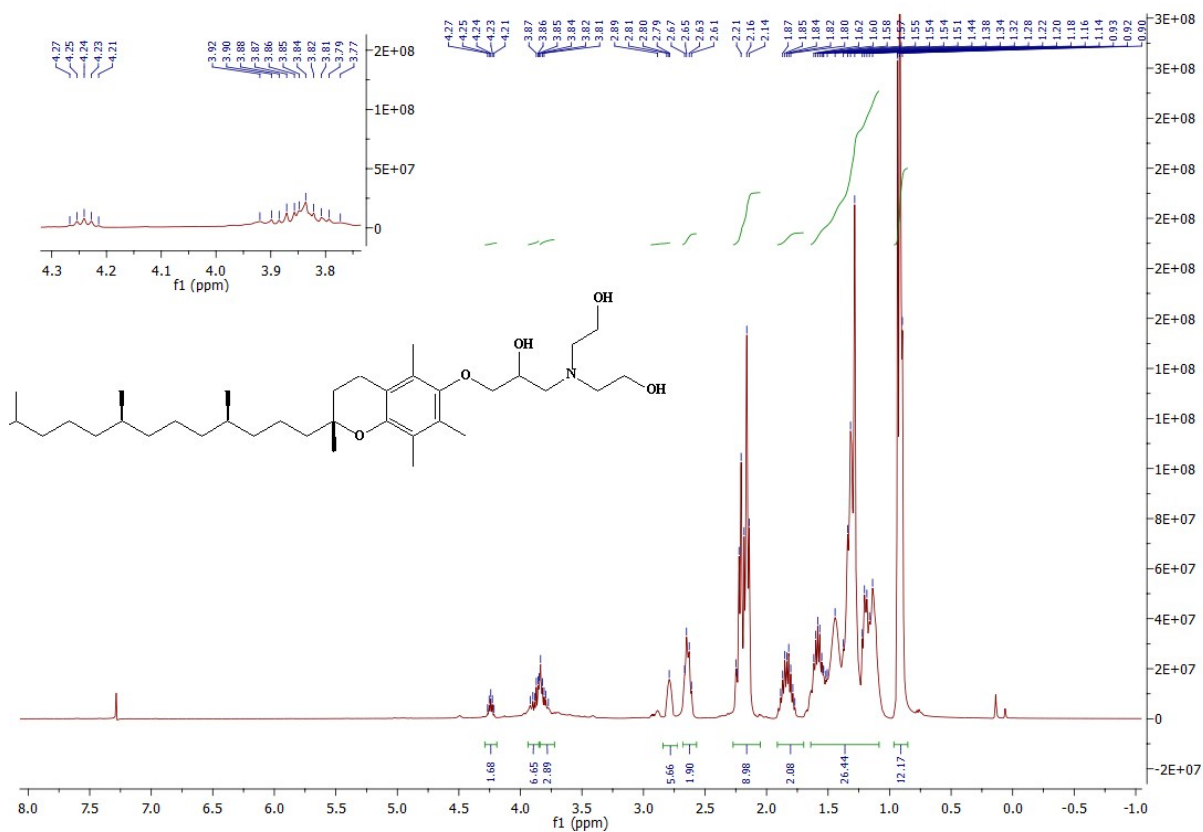

**<sup>1</sup>H NMR Spectra of Intermediate 1B, Scheme 1B**



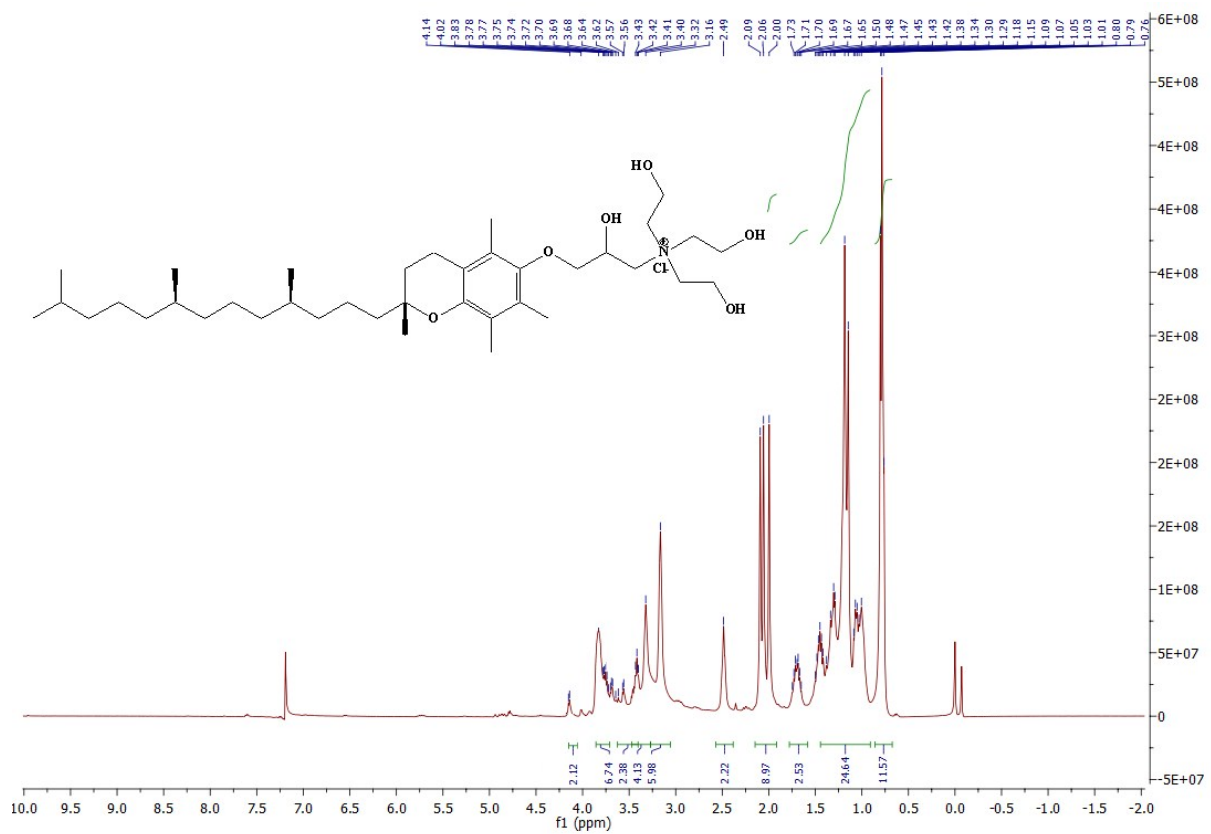

**<sup>1</sup>H NMR Spectra of 1C (Lp1 lipid), Scheme 1)**

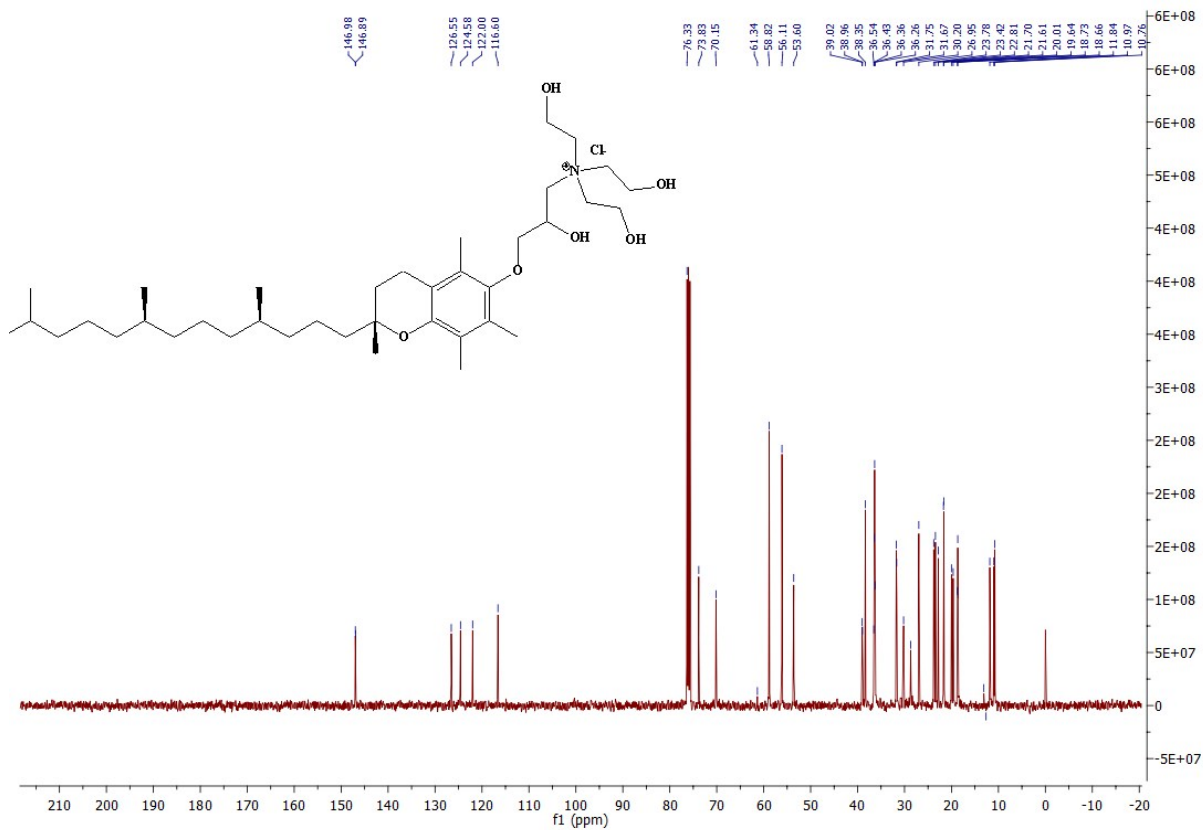

**<sup>13</sup>C NMR Spectra of 1C (Lp1 lipid), Scheme 1**

**KNBC PHARMA SOLUTIONS (P) LTD  
ANALYSIS REPORTS**

Sample Information

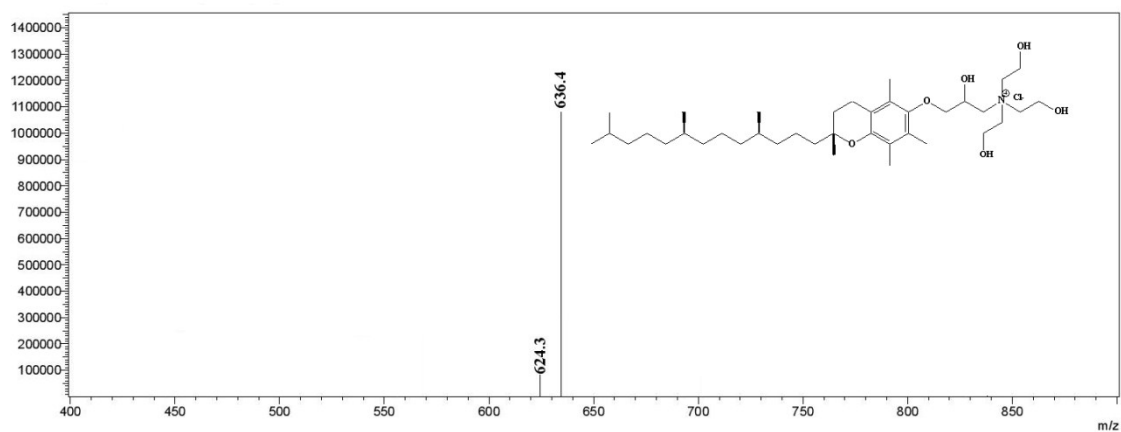

**ESI-Mass Spectra of 1C (Lp1 lipid), Scheme 1**







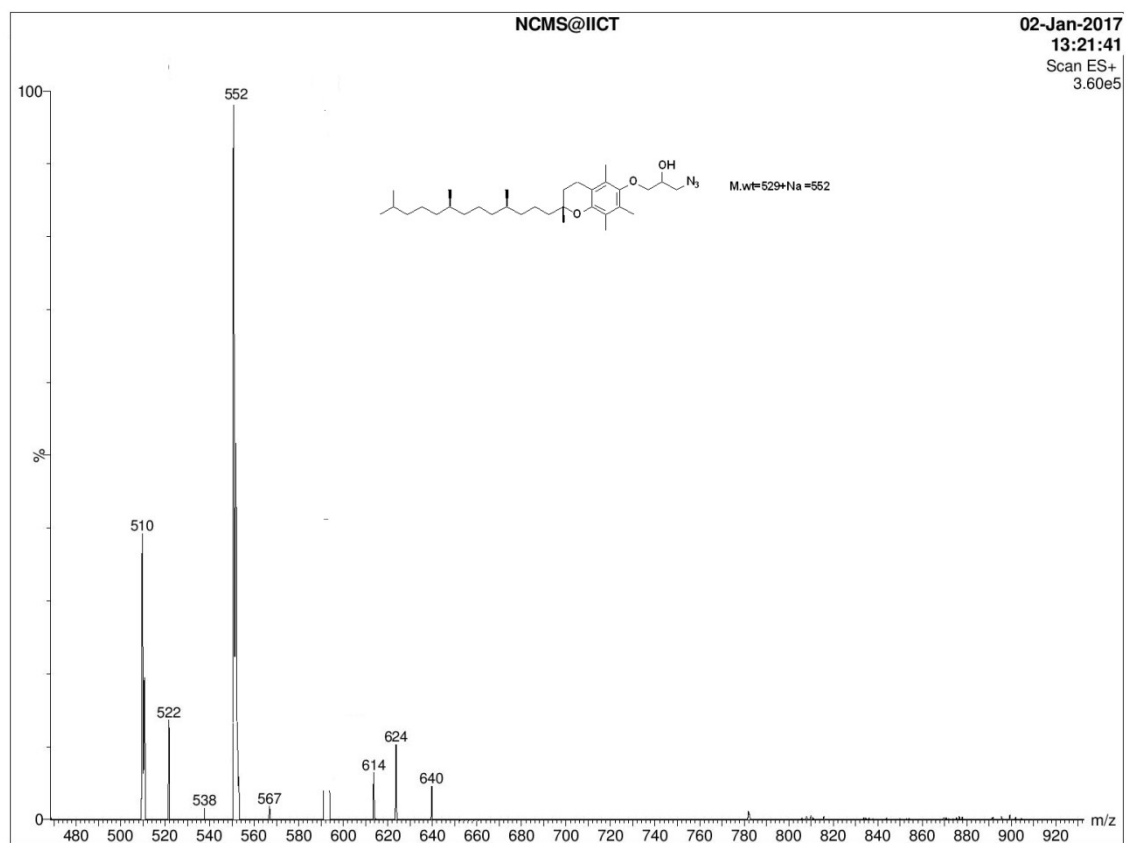

**ESI-Mass Spectra of Intermediate 2B, Scheme 2**

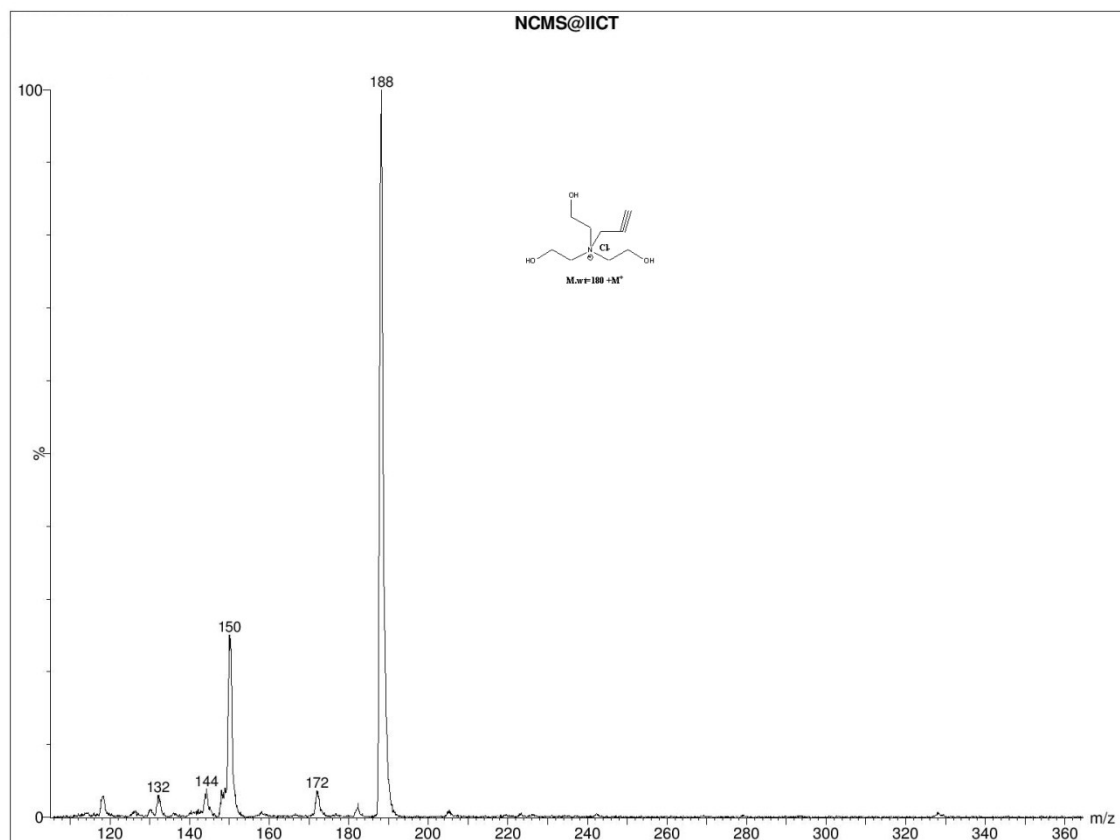

**ESI-Mass Spectra of Intermediate 2A, Scheme 2**

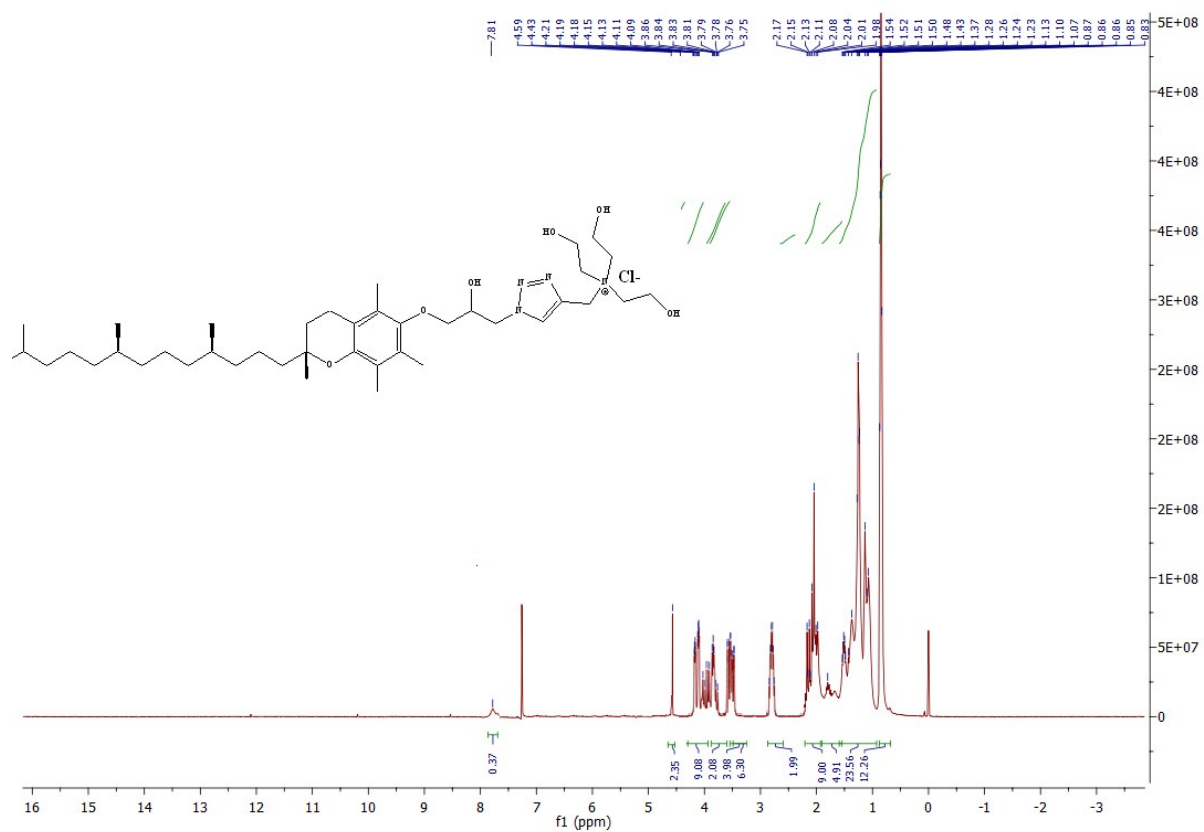

**<sup>1</sup>H NMR Spectra of 2D (Lp1 lipid), Scheme 2)**

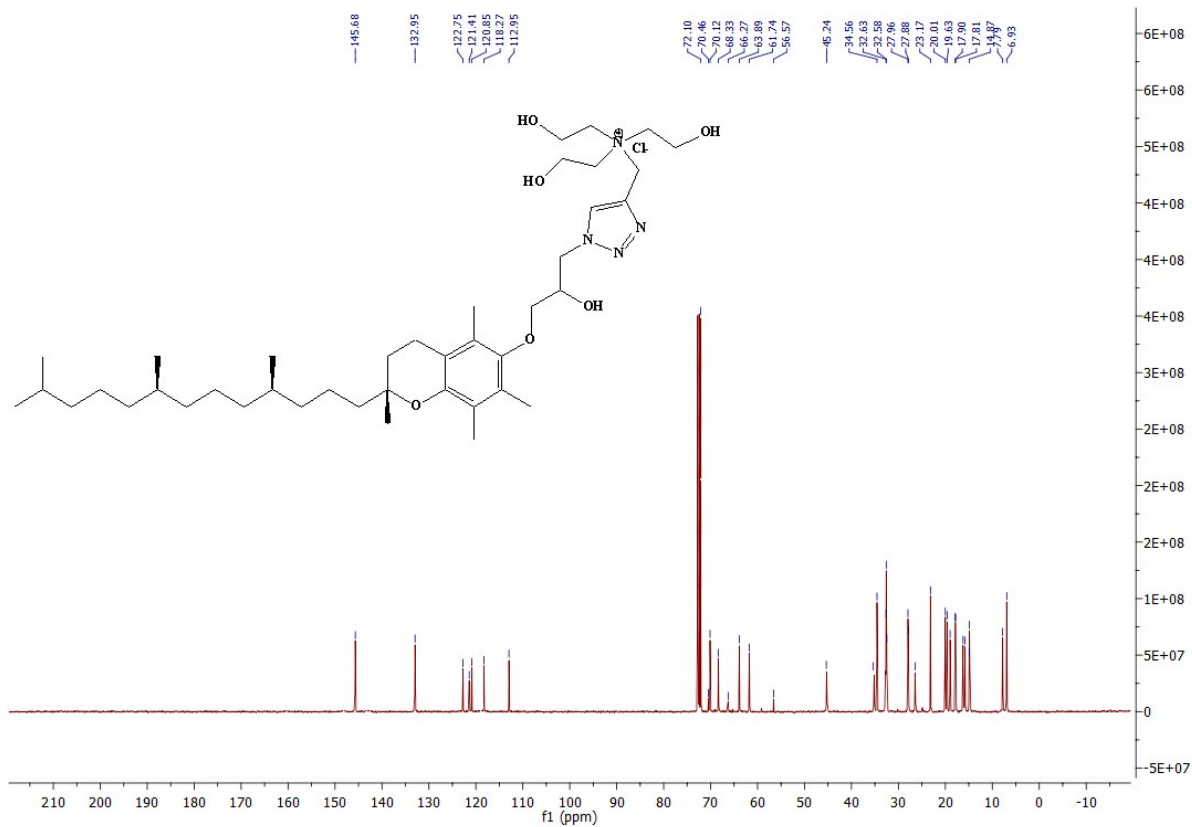

**<sup>13</sup>C NMR Spectra of 2D (Lp2 lipid), Scheme 2**

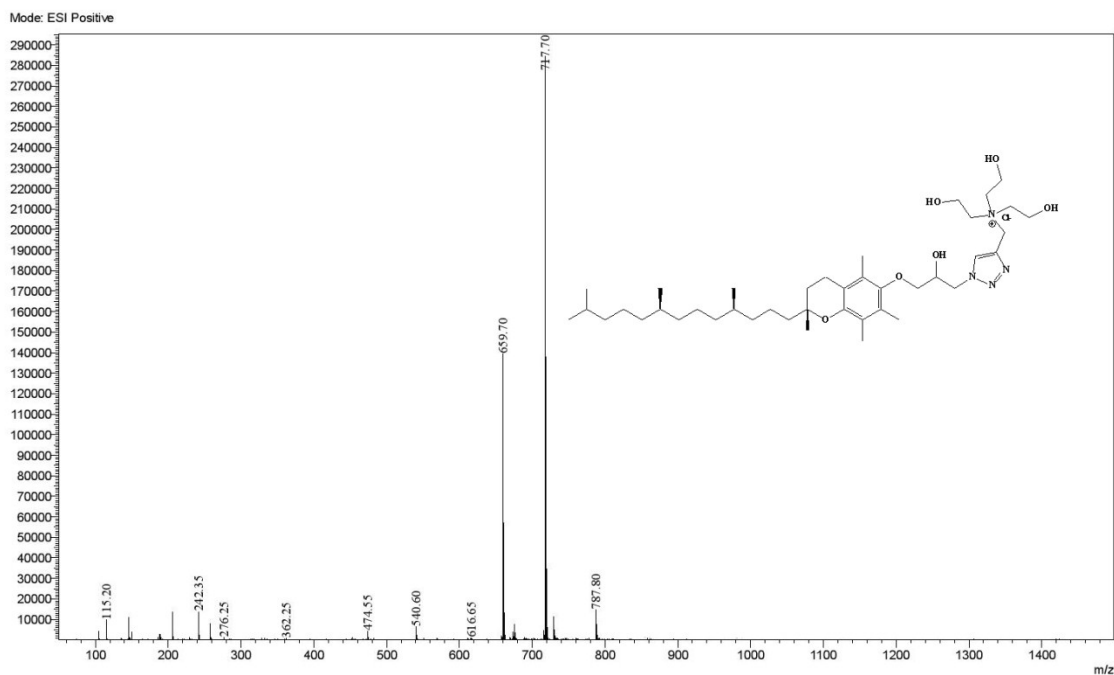

### HRMS-Mass Spectra of 2D (Lp2 lipid), Scheme 2

#### Compound Table

| Compound Label       | RT    | Mass     | MFG Formula   | MFG Diff (ppm) |
|----------------------|-------|----------|---------------|----------------|
| Cpd 4: C41 H72 N4 O6 | 0.188 | 716.5446 | C41 H72 N4 O6 | 0.86           |

| Compound Label       | m/z     | RT    | Algorithm                 | Mass     |
|----------------------|---------|-------|---------------------------|----------|
| Cpd 4: C41 H72 N4 O6 | 717.552 | 0.188 | Find by Molecular Feature | 716.5446 |

#### MFE MS Zoomed Spectrum

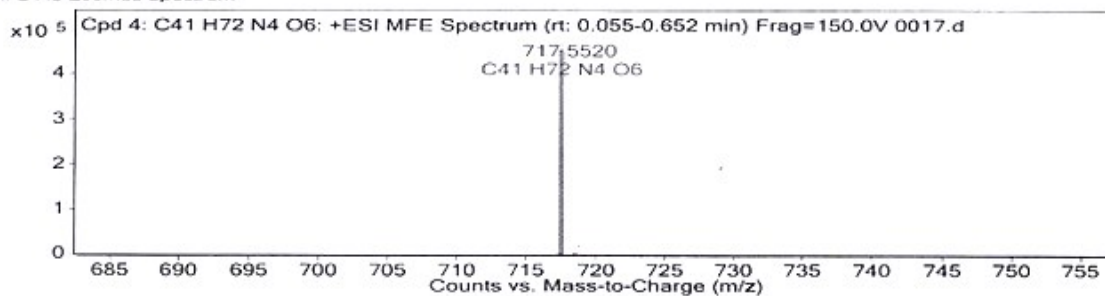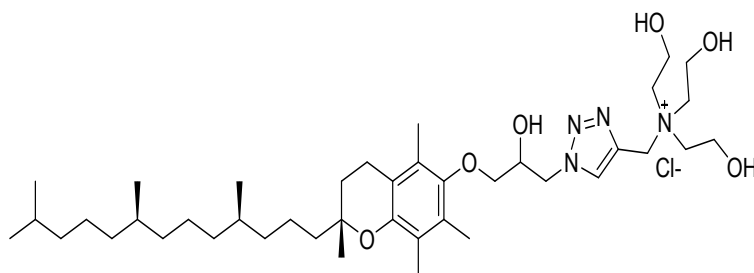

# KNBC PHARMA SOLUTIONS (P) LTD ANALYSIS REPORTS

Sample Information

Line#: 1 R. Time: --- (Scan#: ESI-Positive)  
Raw Mode Averaged 0.437-1.196 (229-625)  
BG Mode Averaged 1.254-1.947 (655-1017) Segment 1 - Event 1

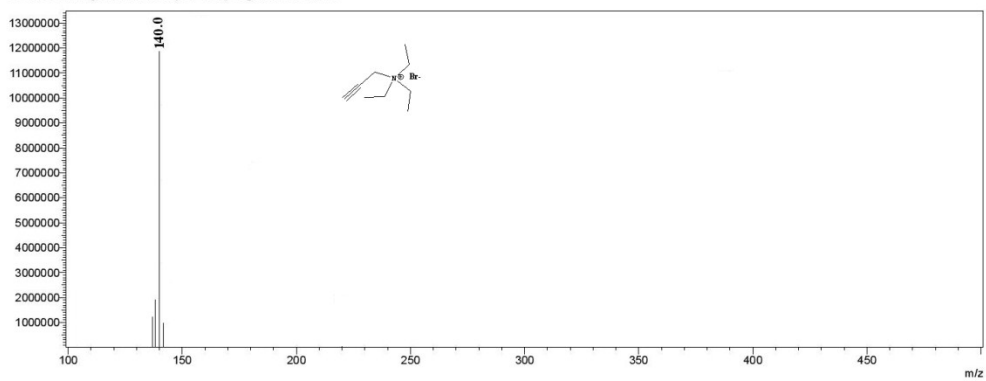

**ESI-Mass Spectra of intermediate 3A, Scheme 3**

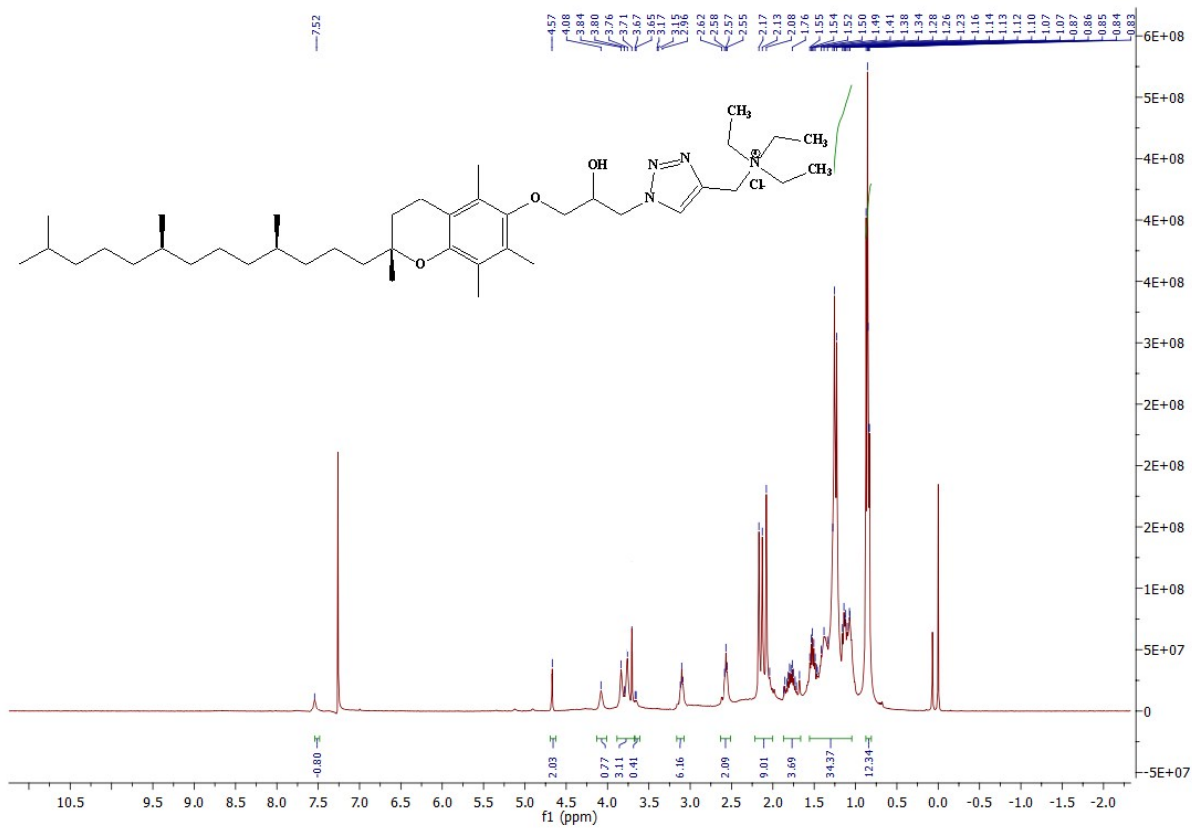

**<sup>1</sup>H NMR Spectra of 3C (Lp3 lipid), Scheme 3)**





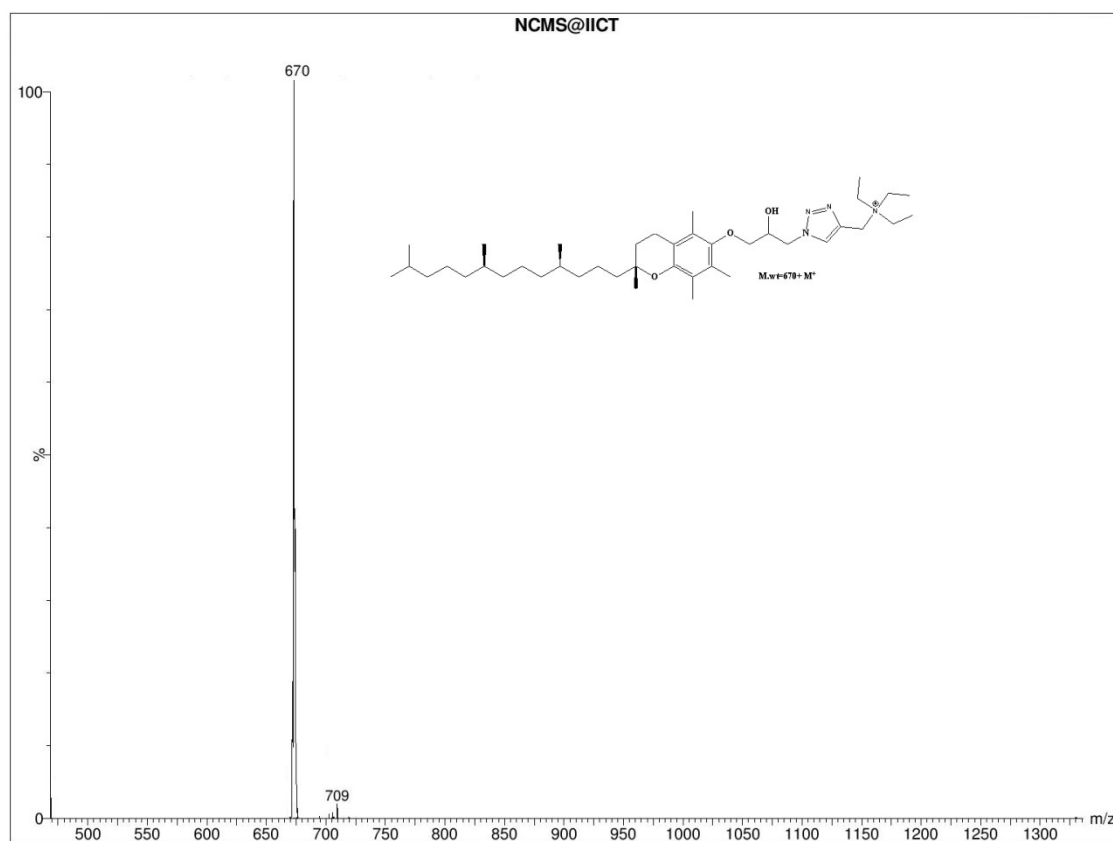

**ESI-Mass Spectra of 3C (Lp3 lipid), Scheme 3**

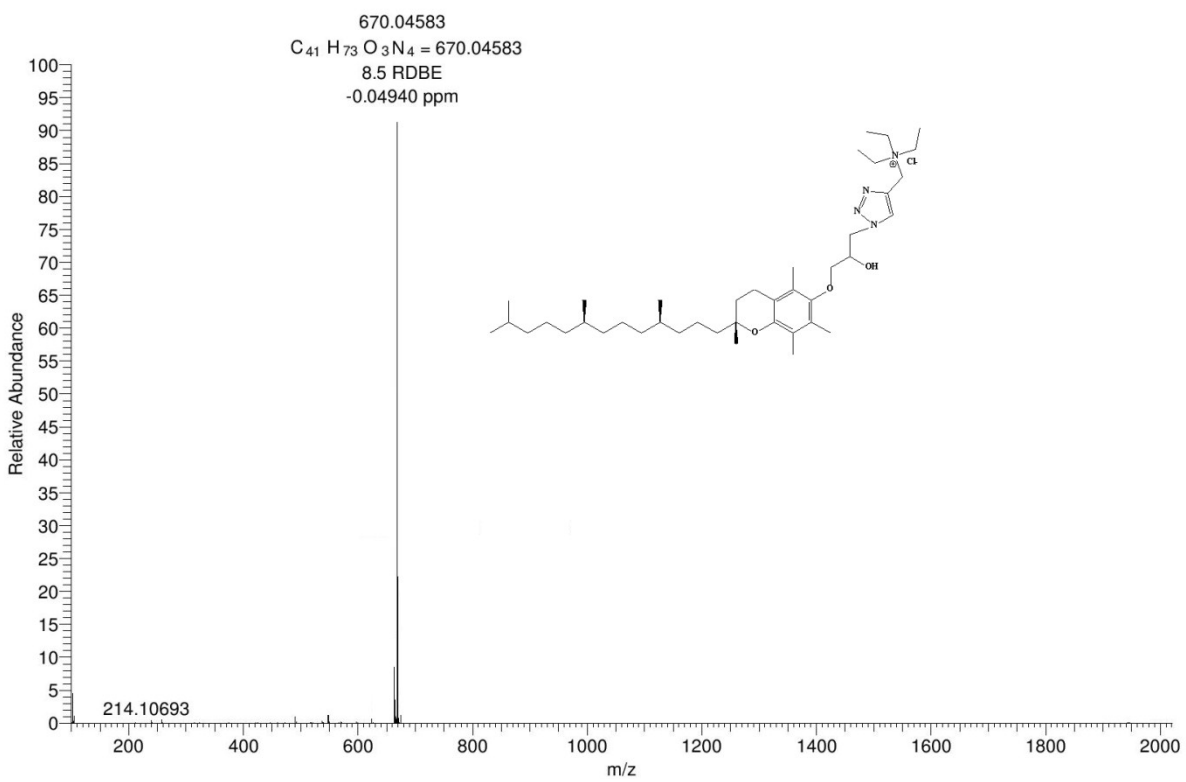

**HRMS-Mass Spectra of 3C (Lp3 lipid), Scheme 3**

## HPLC Profiles of Lp1, Lp2 & Lp3 lipids.

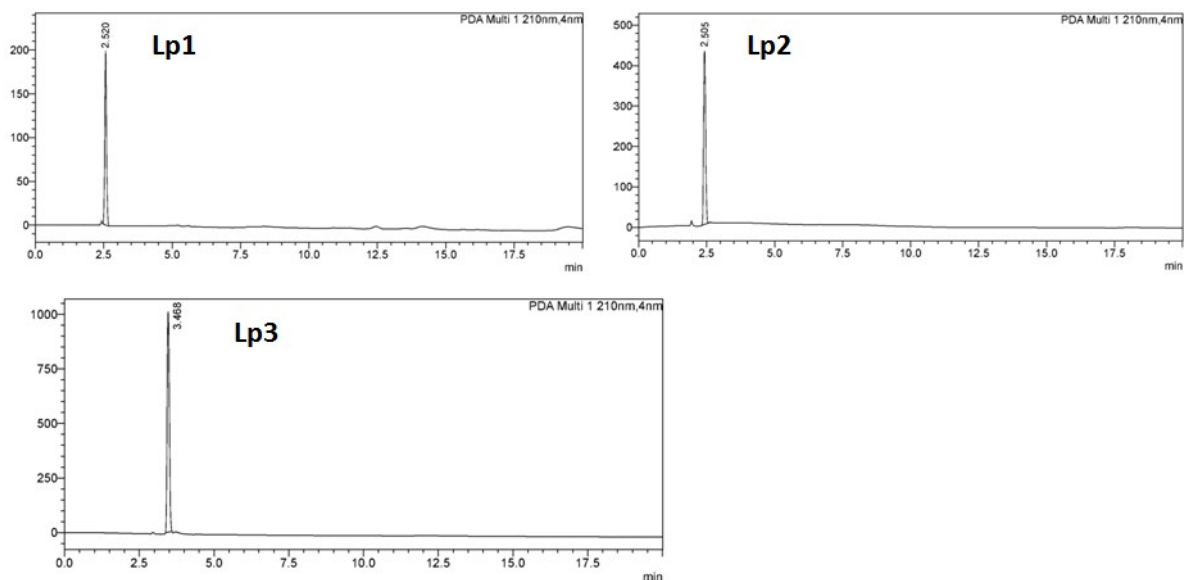

Figure X. RP-HPLC Chromatograms for **Lp1, Lp2 & Lp3 lipids**) obtained using 100% methanol as mobile phase.

### HPLC Conditions:

|                                 |                                            |
|---------------------------------|--------------------------------------------|
| <b>System:</b>                  | Shimadzu Lab Solutions                     |
| <b>Column:</b>                  | Microsorb® 100, RP-18e (10 µm), 125 x 4 mm |
| <b>Mobile Phase:</b>            | 100% Methanol.                             |
| <b>Flow Rate:</b>               | 1.0 mL/min                                 |
| <b>Typical Column Pressure:</b> | 50-55 Bars                                 |
| <b>Detection:</b>               | UV at 263 nm                               |
